# Supplementary material for: Structural characterization and preventive effect on non-alcoholic fatty liver disease of oligosaccharides from Bletilla striata
Source: Royal Society of Chemistry journal article supplement (doi:10.1039/d1fo03899k), 2022-01-01
Supplement: d1fo03899k1.pdf [file d1fo03899k1.pdf]

## Supplementary Data

### Supplementary Methods

1. Polymerization degree determination of BO.

### Supplementary Figures

Fig. 1. Polymerization degree analysis of *Bletilla striata* oligosaccharides (BO).

Fig. 2.  $^1\text{H}$ - $^1\text{H}$  TCOSY NMR spectrum of BO.

Fig. 3. Fasting insulin concentration.

### Supplementary Tables

Table 1. List of primer sequences for RT-PCR analysis.

Table 2. Polymerization degree analysis of BO.

## Supplementary Methods

### 1. Polymerization degree determination of BO

To identify the polymerization degree of BO, HPLC-MS analysis was performed on an ultra-high performance liquid chromatography system (SCIEX, Framingham, MA, USA) with an Agilent Poroshell Hilic column ( $2.1 \times 100$  mm,  $2.7 \mu\text{m}$ ) (Santa Clara, CA, USA) fitted with a Triple TOF 4600 high-resolution mass spectrometry system (SCIEX, Framingham, MA, USA). The mobile phase was composed of 0.1% aqueous formic acid (A) and acetonitrile (B). The gradient elution was performed as follows: 0-1 min, 100% B; 1-2 min, 100% to 85% B; 2-32 min, 85% to 50% B; 32-33 min, 50% to 20% B; 33-37 min, 20% to 85% B; 37-44 min, 85% B. The injection volume was  $10 \mu\text{L}$  and the flow rate was  $0.03 \text{ mL}/\text{min}$ . The ESI source in positive ion mode was used with resolving power 30,000 and a scan range of  $m/z$  100-1000. The parameters were set as followed: capillary temperature,  $600 \text{ }^\circ\text{C}$ ; ion spray voltage, 5.5 kV in positive ion mode; sheath and auxiliary gas flow rate, 55 psi; collision energy, 35 eV.

## Supplementary Figures

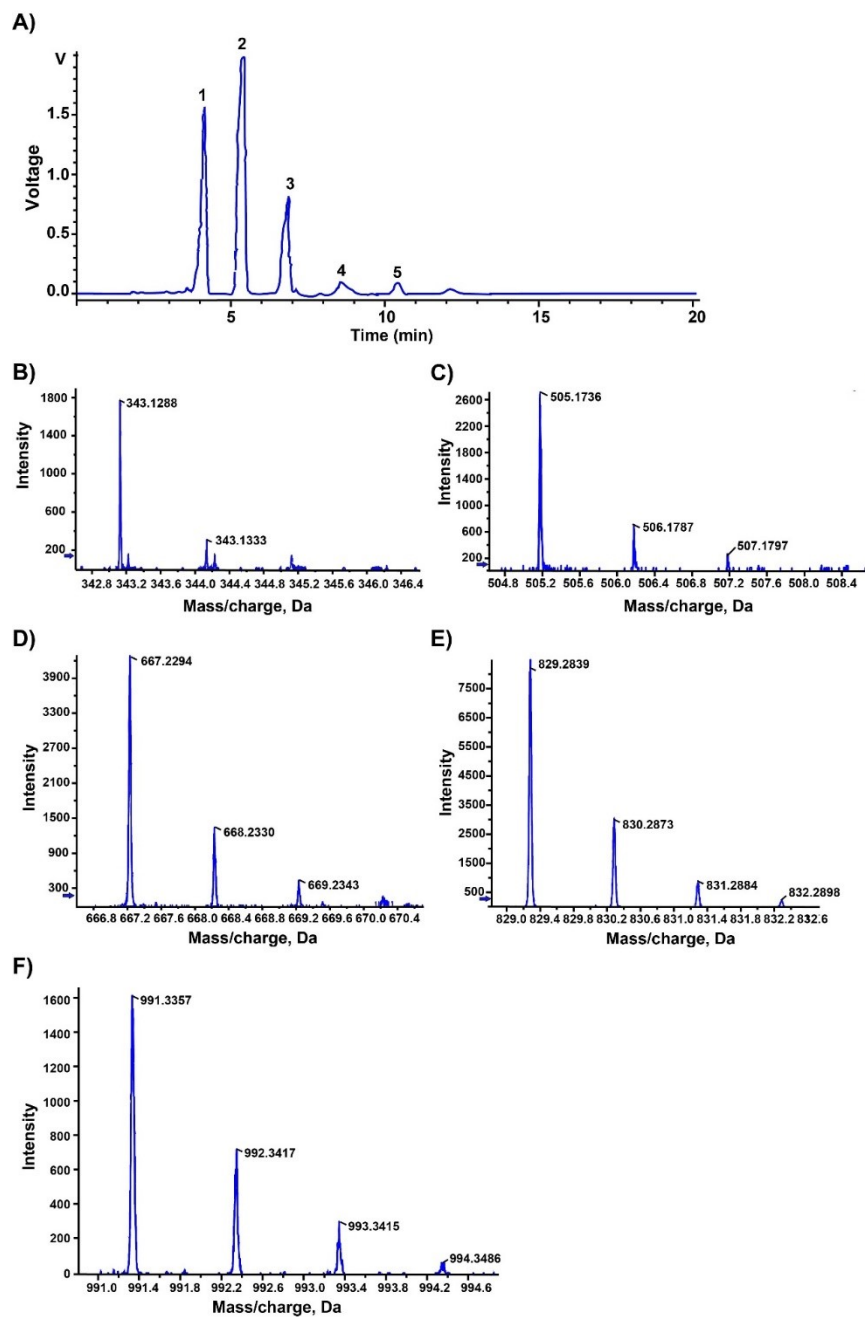

Fig. 1. Polymerization degree analysis of *Bletilla striata* oligosaccharides (BO). (A) HPLC of BO. (B) Disaccharide mass spectrogram of BO. (C) Trisaccharide mass spectrogram of BO. (D) Tetrasaccharide mass spectrogram of BO. (E) Pentasaccharide mass spectrogram of BO. (F) Hexasaccharide mass spectrogram of BO. Peak 1, BO dimerization; Peak 2, BO trimerization; Peak 3, BO tetramer; Peak 4, BO pentamerization; Peak 5, BO hexamer.

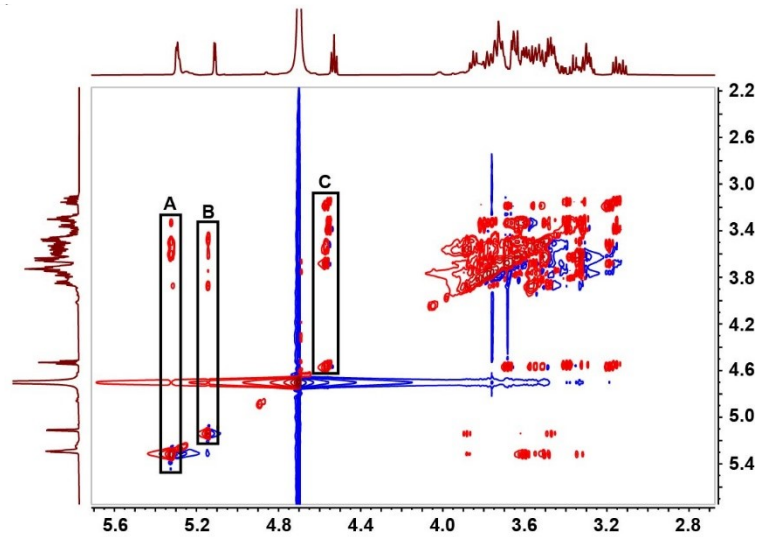

Fig. 2.  $^1\text{H}$ - $^1\text{H}$  TCOZY NMR spectrum of BO. A, B, and C represent three different sugar residues, respectively.

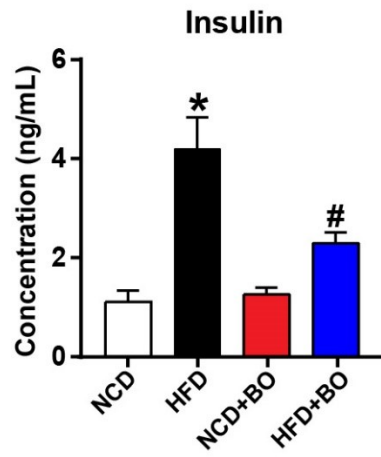

Fig. 3. Level of fasting insulin among experimental groups. Data were presented as mean  $\pm$  SEM.

\* $P < 0.05$ , \*\* $P < 0.01$  vs NCD group; # $P < 0.05$  vs HFD group.

## Supplementary Tables

Table 1. List of primer sequences for RT-PCR analysis

| Name          | Forward primer         | Reverse primer         |
|---------------|------------------------|------------------------|
| <i>Scd1</i>   | TGACCTGAAAGCCGAGAA     | CGTTGAGCACCAGAGTGTAT   |
| <i>Srebpl</i> | ACCTGAAAGCCGAGAA       | GAAGGTGCTAACGAACA      |
| <i>Abcgl</i>  | GTGGATGAGGTTGAGACAGACC | CCTCGGGTACAGAGTAGGAAAG |
| <i>Collal</i> | GCTCCTCTTAGGGGCCACT    | CCACGTCTCACCATTGGGG    |

Table 2. Polymerization degree analysis of BO

| Name               | Formula              | Adduct    | Extraction Mass | Intensity |
|--------------------|----------------------|-----------|-----------------|-----------|
| BO dimerization    | $C_{12}H_{22}O_{11}$ | $[M+H]^+$ | 343.12          | 5723      |
| BO trimerization   | $C_{18}H_{32}O_{16}$ | $[M+H]^+$ | 505.18          | 19128     |
| BO tetramer        | $C_{24}H_{42}O_{21}$ | $[M+H]^+$ | 667.23          | 44031     |
| BO pentamerization | $C_{30}H_{52}O_{26}$ | $[M+H]^+$ | 829.28          | 88319     |
| BO hexamer         | $C_{36}H_{62}O_{31}$ | $[M+H]^+$ | 991.33          | 31881     |
